1 **Title:** Social clustering of unvaccinated children: measles-mumps-rubella  
2 vaccination coverage in schools in the Netherlands

3

4 **Running head:** clustering of unvaccinated children in schools

5

6 **Authors:** Don Klinkenberg<sup>1</sup>, Albert Jan van Hoek<sup>1</sup>, Irene Veldhuijzen<sup>1</sup>, Susan Hahné<sup>1</sup>, Jacco Wallinga<sup>1,2</sup>

7 **Affiliations**

8 1. Centre for Infectious Disease Control, National Institute for Public Health and the Environment,

9 P.O.Box 1, 3720 BA Bilthoven, The Netherlands

10 2. Department of Medical Statistics, Leiden University Medical Centre, P.O. Box 9600, 2300 RC

11 Leiden, The Netherlands

12

13 **Conflict of interest:** The authors declare no conflicts of interest

14 **Funding:** No external funding has been used for this study

15

16 **Corresponding author:** Don Klinkenberg

17 **Corresponding author contact:** Tel +31 30 2749111, E-mail don.klinkenberg [at] rivm.nl

18

19

20

21 **Abstract**

22 Background: For the measles-mumps-rubella (MMR) vaccine, the WHO-recommended coverage for  
23 herd protection is 95% for measles and 80% for rubella and mumps. However, a national vaccine  
24 coverage does not reflect social clustering of unvaccinated children, e.g. in schools of Orthodox  
25 Protestant or Anthroposophic identity in The Netherlands. To fully characterise this clustering, we  
26 estimated one-dose MMR vaccination coverages at all schools in the Netherlands.

27

28 Methods: By combining postcode catchment areas of schools and school feeder data, each child in  
29 the Netherlands was characterised by residential postcode, primary and secondary school (referred  
30 to as school career). Postcode-level vaccination data were used to estimate vaccination coverages  
31 per school career. These were translated to coverages per school, stratified by school identity.

32

33 Results: Most schools had vaccine coverages over 99%, but major exceptions were Orthodox  
34 Protestant schools (63% in primary and 58% in secondary schools) and Anthroposophic schools (67%  
35 and 78%).

36

37 Conclusions: School-level vaccine coverage estimates reveal strong clustering of unvaccinated  
38 children. The school feeder data reveal strongly connected Orthodox Protestant and Anthroposophic  
39 communities, but separated from one another. This suggests that even at a national one-dose MMR  
40 coverage of 97.5%, thousands of children per cohort are not protected by herd immunity.

41

42 **Keywords:** vaccine; vaccine-preventable disease; immunisation; herd immunity; childhood disease;  
43 infectious disease; clustering; social network

44

## 45 Introduction

46

47 The impact of childhood vaccination programmes on protecting children from infection can be  
48 measured in various ways. Common indicators are the remaining disease incidence and disease  
49 burden, and the national vaccination coverage [1]. For measles, WHO recommends a threshold value  
50 for the vaccination coverage of 95% for two doses [2], and for rubella and mumps of 80% [3]. Many  
51 EU countries have an explicit target coverage for the measles-mumps-rubella (MMR) vaccine of 95%  
52 [1]. However, outbreaks occur among unvaccinated children when they are clustered, even at high  
53 values for an average national vaccination coverage [4]. The Netherlands, in particular, have an  
54 average national vaccination coverage for MMR that is among the highest in Europe  
55 (<http://data.euro.who.int/cisid/>), but the substantial socio-geographic clustering of unvaccinated  
56 children results in repeated outbreaks of measles, mumps and rubella [5-7].

57

58 Clustering of unvaccinated children is often described geographically [8-13], but most contacts  
59 between children are made at school [14]. Indeed, daycare centres or schools play a major role  
60 during outbreaks in well-immunised countries [15-18]. In the Netherlands, the clustering of  
61 unvaccinated children at school is enhanced by a school system where parents are free to start and  
62 choose schools based on their own philosophy or conviction, resulting in a range of registered school  
63 identities. There are two social groups with their own school identities that are known for a lower  
64 vaccination coverage: Orthodox Protestants, who live spatially clustered in the so-called Bible Belt  
65 and have a vaccination coverage of about 60% [19, 20]; and Anthroposophics, who live spatially  
66 more dispersed and have school vaccination coverages ranging from 60% to 90% [21]. There is also a  
67 more diffuse group of people who fear side-effects and perceive the diseases as mild [22], but there  
68 is not one school identity linked to that group.

69

70 Vaccination coverages by school are routinely collected in various countries, including Germany and  
71 the United States [17, 18, 23-25], but reporting is frequently done by averaging school coverages  
72 locally, by county or district [24, 26]. Whereas this is very helpful for signaling which regions are at  
73 risk of infection, an average or even a local average does not fully capture the variability between  
74 schools, which is essential to fully understand the risk of outbreaks [25]. For that, we require the  
75 complete frequency distribution of school vaccination coverages.

76

77 The aim of our study was to estimate the MMR vaccination coverages for all primary and secondary  
78 schools in the Netherlands, and assess the variation in vaccination coverage in primary and  
79 secondary schools. We focussed on a single-dose rather than the WHO-recommended two-dose  
80 vaccination, because the second dose in the Netherlands is given only at nine years of age so that  
81 the one-dose coverage is a better indication of protection in primary schools. Also, a single-dose  
82 coverage better reflects willingness versus refusal to vaccinate, and shows where the completely  
83 unvaccinated children are. We discuss the implications of the observed variation for the risk of  
84 outbreaks in a population with high mean vaccination coverage.

85

86

## 87 Methods

88

89 Briefly, we assumed a steady state population of children characterised by residential postcode,  
90 primary school, and secondary school (school career). This population is constructed by use of  
91 school-level catchment data of the postcode areas in which school children live, and school feeder  
92 data of children moving from primary to secondary school. The steady-state assumption allowed us  
93 to use postcode-level coverage data for a single cohort to estimate coverages in both primary and  
94 secondary schools. We used a statistical hierarchical model, in which the vaccination status of a child  
95 is explained by the school career, with a fixed effect of the school identities (identity career) and

96 random effects of the two schools. The school feeder data create dependencies of coverage  
97 estimates between primary and secondary schools sharing many children, which is especially  
98 relevant if those schools have different identities.

99

## 100 Datasets

101 We used five datasets to estimate school vaccination coverages (dark green in Figure 1), and two  
102 datasets for validation of estimated coverages (Utrecht and Anthroposophic school data).

103

104 For estimation, we combined postcode-level MMR vaccination coverage data with postcode-level  
105 data of the schools that children attend (primary school and secondary school catchment data),  
106 school-level data on numbers of children moving from primary to secondary schools (school feeder  
107 data), and school identity data. The coverage data came from the Dutch vaccination registry  
108 Praeventis [27], of which we used the single MMR vaccination status in 2013 of 197,382 children of  
109 birth cohort 2003 at age 10. In the Netherlands, MMR is given at 14 months and 9 years of age, so  
110 focusing on a single-dose vaccination better reflects vaccine coverage across all ages in schools. The  
111 school catchment, feeder, and identity data came from the Education Executive Agency of the  
112 Ministry of Education [28], of which we used primary school catchment data from October 2012,  
113 secondary school catchment data from October 2013, and feeder data from September 2013.

114

115 Schools were categorised into 15 groups based on their identity [28]. Most identities are related to  
116 religion, but exceptions are Municipal (“Openbaar”) which are run by the local government, and  
117 General (“Algemeen bijzonder”) which is a heterogeneous group of schools with various non-  
118 religious backgrounds (e.g. Montessori, Dalton, Jenaplan). Special types of identity were  
119 “Collaborations”, which consisted of schools categorised as collaboration (“Samenwerking”) of two  
120 or more identities among Protestant, Roman Catholic, General, and/or Municipal; and “Other”,  
121 which consisted of all schools categorized as Rest (“Overige”) in the dataset, or left blank.

122

123 For validation we used data collected by the municipal health service Utrecht (Utrecht data), which  
124 covers part of the Bible Belt and consists of actual coverage data for 488 schools; and data from a  
125 study in 2014 on vaccination hesitancy on Anthroposophic schools (Anthroposophic school data),  
126 consisting of coverage data for 11 schools [21].

127

## 128 Statistical analysis

129 Figure 1 shows how the data are used in a model to obtain the MMR coverage per school (more  
130 detail in Supplement S1). First, the school catchment data and feeder data were combined to build  
131 the population structure, in which each child is characterized by a postcode and a school career, i.e.  
132 a primary and secondary school, one of which the child actually attends and the other which it has  
133 attended or will attend. Then, this population structure is used with the vaccination data and school  
134 identities in a Bayesian regression analysis in stan ([mc-stan.org](https://mc-stan.org)), called from R statistical software  
135 [29] with the Rstan package ([mc-stan.org/rstan](https://mc-stan.org/rstan)). Conceptually, through the regression equation  
136 (Figure 1) the observed coverages in postcode areas are explained by the school careers of the  
137 children living in that postcode area, with a fixed effect due to the identities of the schools, and a  
138 random effect for each school.

139

140 The regression analysis resulted in estimated vaccination coverages per school career, which were  
141 used to derive our results of interest: vaccination coverages per school. The analysis also provided  
142 estimated coverages per postcode area.

143

144 Because there were 15 different school identities in the data, and therefore many more possible  
145 identity careers, we had to aggregate identities and identity careers to limit the number of variables  
146 in the regression. This was done in two preliminary analyses. The first was to define a “Rest” identity  
147 by grouping all identities without evidence of lower coverage than the major identities (Municipal,

148 Protestant, and Roman Catholic). That resulted in five primary school identities and three secondary  
 149 school identities. The second was to aggregate identity careers where possible, resulting in a final set  
 150 of eight identity careers in the final analysis (see Supplement S1 for more detail).  
 151

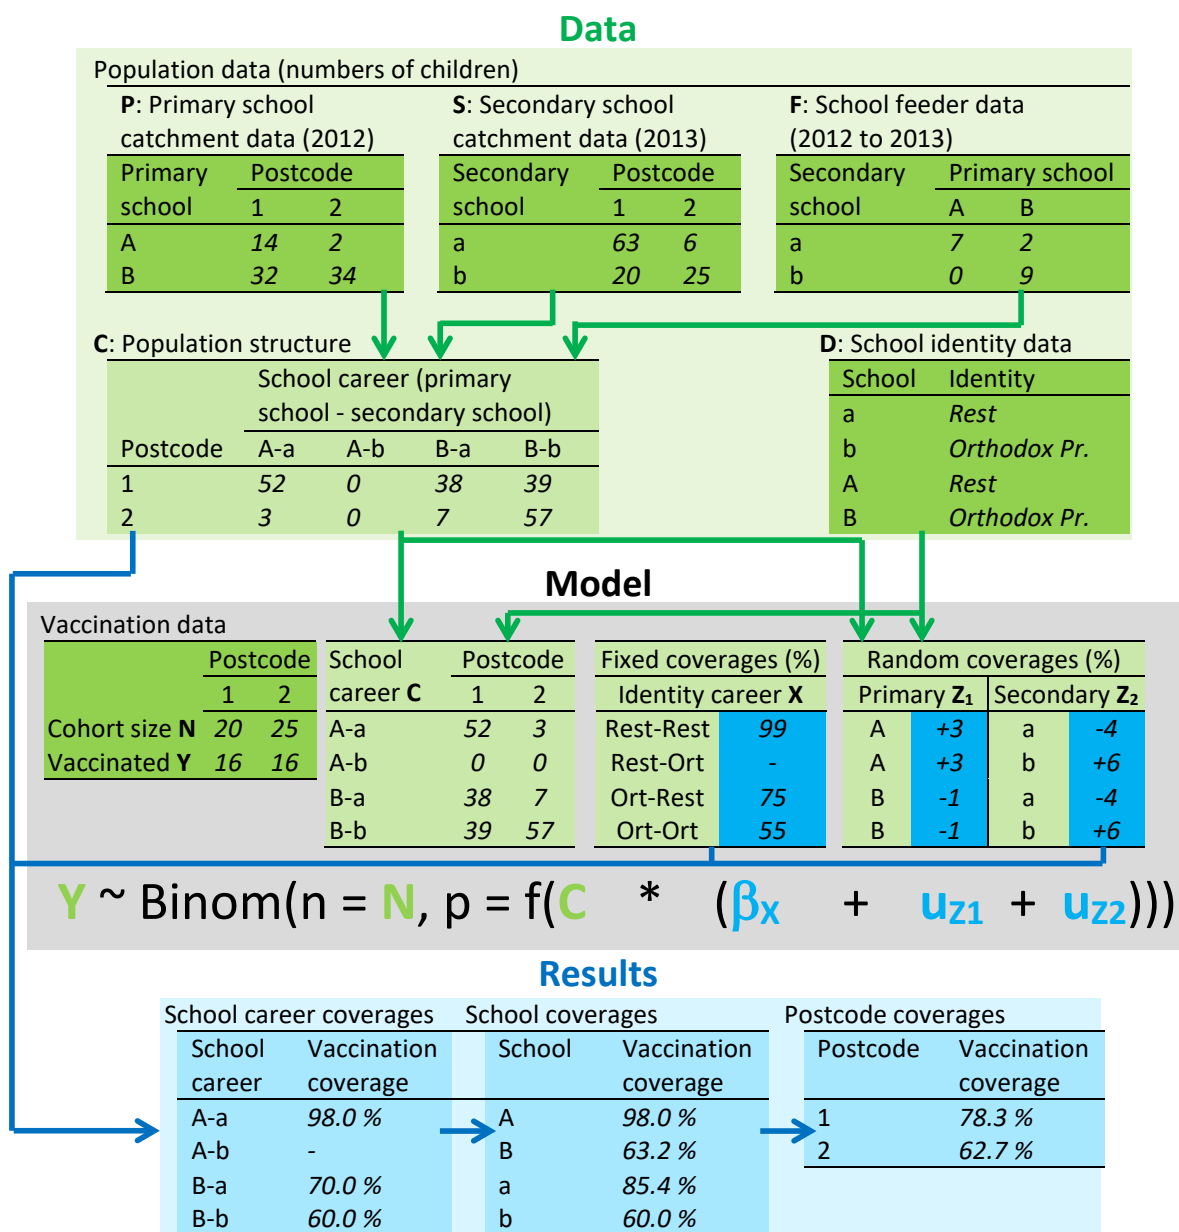

153 Figure 1. Conceptual outline of the method to estimate school vaccination coverages (full details  
 154 in Supplement S1). Numbers are fictional but mutually consistent. Green tables are data: dark  
 155 green are original datasets, light green are linked data. Blue tables are results: dark blue are  
 156 original estimates (logit-transformed in the actual analysis), light blue are derived quantities. Top

157 (data): three population datasets are linked to build the population structure of numbers of  
158 children by school career and residential postcode area. Middle (model): regression model with  
159 vaccination data per postcode as dependent variable; the independent variables are the school  
160 careers of the children, mapped to postcode areas through function  $f(\cdot)$ , in which the population  
161 structure is used to map school career coverages to postcode area coverages, and in which the  
162  $\text{logit}(\text{coverage})$  of each school career is modelled as the sum of a fixed identity career effect and  
163 two random school effects. Bottom (results): the estimated coverages and deviations are used to  
164 calculate the coverage per school career, and combined with the population structure to  
165 calculate the coverages per school and per postcode.

166

167

## 168 Results

169

### 170 Aggregating school identities and identity careers

171 We first ran two preliminary regression analyses (detail in Supplement S1) in order to reduce the  
172 number of school identities and identity careers in our final analysis. Most school identities were  
173 aggregated into one “Rest” group, but identities that remained separate were Anthroposophic and  
174 Orthodox Protestant in both primary and secondary schools, and General and Hindu in primary  
175 schools (Table 1). From these remaining identities, 15 identity careers were formed, of which eight  
176 were kept separate after a second aggregation step to obtain our final results (Table 2).

177

178

179

180

181



182 Table 1. Identities of primary and secondary schools: numbers of schools per original identity, and  
 183 identity after aggregation

| Identity               | Primary schools |                     | Secondary schools |                     |
|------------------------|-----------------|---------------------|-------------------|---------------------|
|                        | <i>n</i>        | Aggregated identity | <i>n</i>          | Aggregated identity |
| Municipal              | 2444            | Rest                | 352               | Rest                |
| General                | 497             | General             | 392               | Rest                |
| Anthroposophic         | 70              | Anthroposophic      | 11                | Anthroposophic      |
| Roman Catholic         | 2236            | Rest                | 248               | Rest                |
| Protestant             | 1882            | Rest                | 281               | Rest                |
| Reformed (Liberated)   | 118             | Rest                | 9                 | Rest                |
| Orthodox Protestant    | 180             | Orthodox Protestant | 34                | Orthodox Protestant |
| Evangelic              | 13              | Rest                | 3                 | Rest                |
| Evangelical Fraternity | 2               | Rest                | 0                 | -                   |
| Hindu                  | 6               | Hindu               | 0                 | -                   |
| Islamic                | 43              | Rest                | 1                 | Rest                |
| Jewish                 | 2               | Rest                | 2                 | Rest                |
| Interconfessional      | 12              | Rest                | 4                 | Rest                |
| Collaborations         | 65              | Rest                | 362               | Rest                |
| Other                  | 0               | -                   | 71                | Rest                |
| Total                  | 7570            |                     | 1770              |                     |

184

185

186

187

188 Table 2. Identity careers: numbers of children in feeder data, and aggregate careers after the  
 189 second aggregation step (Ant = Anthroposophic, Gen = General, Hin = Hindu, Ort = Orthodox  
 190 Protestant, Rest = Rest)

| Primary school<br>identity | Secondary school identity |                  |                     |                  |          |                  |
|----------------------------|---------------------------|------------------|---------------------|------------------|----------|------------------|
|                            | Anthroposophic            |                  | Orthodox Protestant |                  | Rest     |                  |
|                            | <i>n</i>                  | Aggregate career | <i>n</i>            | Aggregate career | <i>n</i> | Aggregate career |
| Anthroposophic             | 679                       | Ant - Ant        | 0                   | -                | 876      | Ant - Rest       |
| Orthodox                   | 0                         | -                | 4298                | Ort - Ort        | 765      | Ort - Rest       |
| Protestant                 |                           |                  |                     |                  |          |                  |
| Hindu                      | 0                         | -                | 0                   | -                | 262      | Hin - Rest       |
| General                    | 182                       | Gen - Rest       | 3                   | Rest - Ort       | 13246    | Gen - Rest       |
| Rest                       | 778                       | Rest - Rest      | 782                 | Rest - Ort       | 182471   | Rest - Rest      |

191

192

193

194 Estimating school vaccination coverages

195 The overall vaccination coverage in our dataset (one dose of MMR vaccine in birth cohort 2003 at  
 196 the age of 10) was 97.5%. Figure 2 shows the comparison of estimated school vaccination coverages  
 197 with the validation datasets. In all Utrecht schools as well as the Anthroposophic schools there is a  
 198 clear correlation between true and estimated coverage, and almost all credible intervals include the  
 199 true coverage. Two Rest schools with coverages below 90% have too high estimates; these are both  
 200 Protestant schools.

201

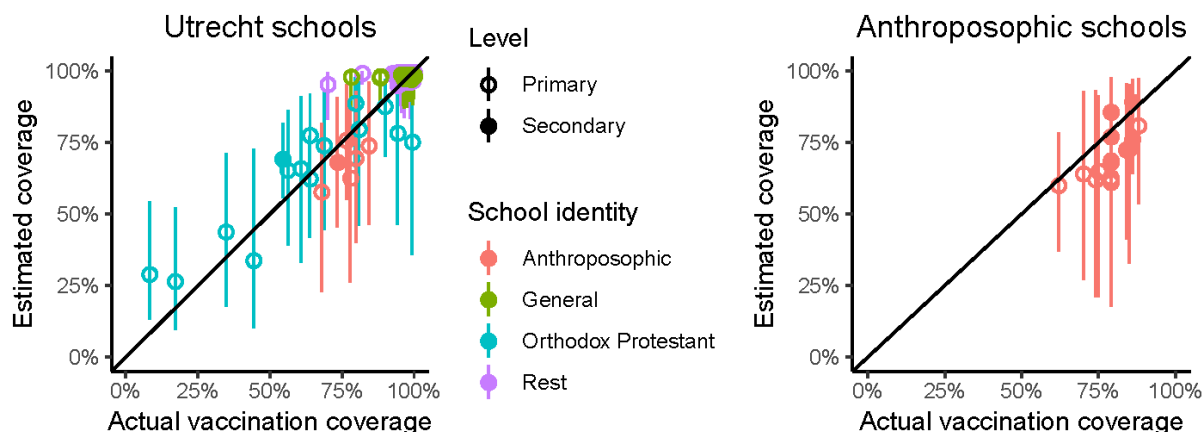

203 Figure 2: validation plots of estimated vaccination coverages with 95% credible interval compared  
204 to actual vaccine coverage in Utrecht, 2013 (left) and on Anthroposophical schools in the  
205 Netherlands, 2012 (right).

206

207 There is clear spatial clustering of unvaccinated children: most postcode areas had vaccination  
208 coverages around 99%, but about 4% of postcode areas had coverages below 95%, mainly in the  
209 Bible belt (Figures 3, 4). At school level, nonetheless, clustering was much more pronounced. The  
210 large majority of schools have higher coverages than postcode area, above 99%, whereas  
211 specific schools have much lower coverages. In primary schools, vaccination coverage on Orthodox  
212 Protestant schools (62.8%) is slightly lower than on Anthroposophic schools (66.6%), whereas in  
213 secondary schools this difference is much larger (58.4% and 78.4%, respectively, Table 3). General  
214 primary schools have a slightly lower vaccination coverage than Rest primary schools (Table 3), but  
215 less than 1% of all these schools have a coverage below 95% (Figure 3). Coverages of Hindu schools  
216 are estimated to be lower than in the Rest or General schools, but this result is highly uncertain  
217 because of the small number of schools (Table 3). Of all identities, Orthodox Protestant schools have  
218 the largest variation in vaccine coverage (Figure 3).

219

220 Table 3. Vaccination status by school identity: mean vaccination coverage at school level (95%  
 221 credible interval), and number of unvaccinated children per cohort of 197,382 (95% credible  
 222 interval across all schools).

| School identity | Primary schools                      |                                  | Secondary schools                    |                                  |
|-----------------|--------------------------------------|----------------------------------|--------------------------------------|----------------------------------|
|                 | Mean vaccination coverage per school | Unvaccinated children per cohort | Mean vaccination coverage per school | Unvaccinated children per cohort |
| Anthroposophic  | 66.6% [59.6 ; 73.4]                  | 496 [402 ; 588]                  | 78.4% [71.3 ; 85.5]                  | 242 [164 ; 321]                  |
| Orthodox        | 62.8% [60.3 ; 65.2]                  | 1904 [1799 ; 2009]               | 58.4% [52.5 ; 64.0]                  | 1958 [1853 ; 2063]               |
| Protestant      |                                      |                                  |                                      |                                  |
| Hindu           | 74.5% [50.3 ; 94.6]                  | 60 [15 ; 95]                     |                                      |                                  |
| General         | 97.4% [96.4 ; 98.1]                  | 340 [243 ; 448]                  |                                      |                                  |
| Rest            | 98.7% [98.6 ; 98.8]                  | 2198 [2041 ; 2366]               | 98.4% [98.3 ; 98.5]                  | 2797 [2655 ; 2942]               |
| All schools     | 97.5% [97.4 ; 97.5]                  | 4998 [4872 ; 5129]               | 97.5% [97.3 ; 97.7]                  | 4998 [4872 ; 5129]               |

223

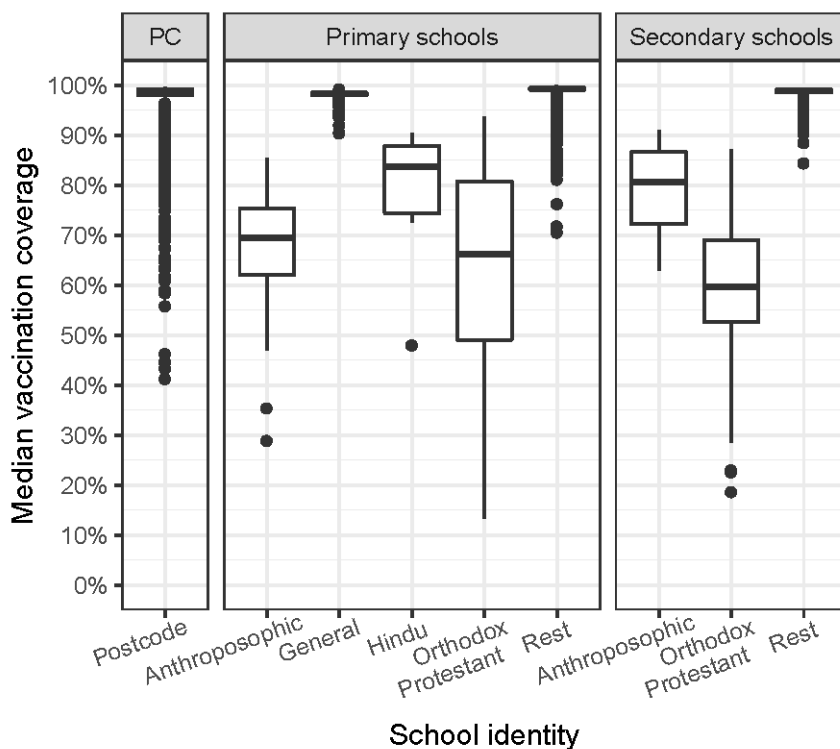

225 Figure 3: posterior median vaccination coverages of all schools, grouped by school identity.  
226 Displayed are medians (of the median coverages) with interquartile range of (IQR, boxes), and  
227 whiskers extending to 1.5 times the IQR or most extreme value, whichever is closest to the  
228 median. Dots are outliers.

229

230 Figure 4 shows maps of the school locations, partitioned by school identity, colour coded to indicate  
231 estimated vaccination coverage, and as a reference a postcode map of estimated vaccination  
232 coverages. The Orthodox Protestant schools are clearly concentrated in the Bible Belt, with most of  
233 the very-low coverage schools east from the centre. The lower-coverage Rest schools are also  
234 predominantly located in the Bible Belt area; most of these have the Protestant identity (not shown).  
235 Anthroposophic schools are more widely distributed across the country.

236

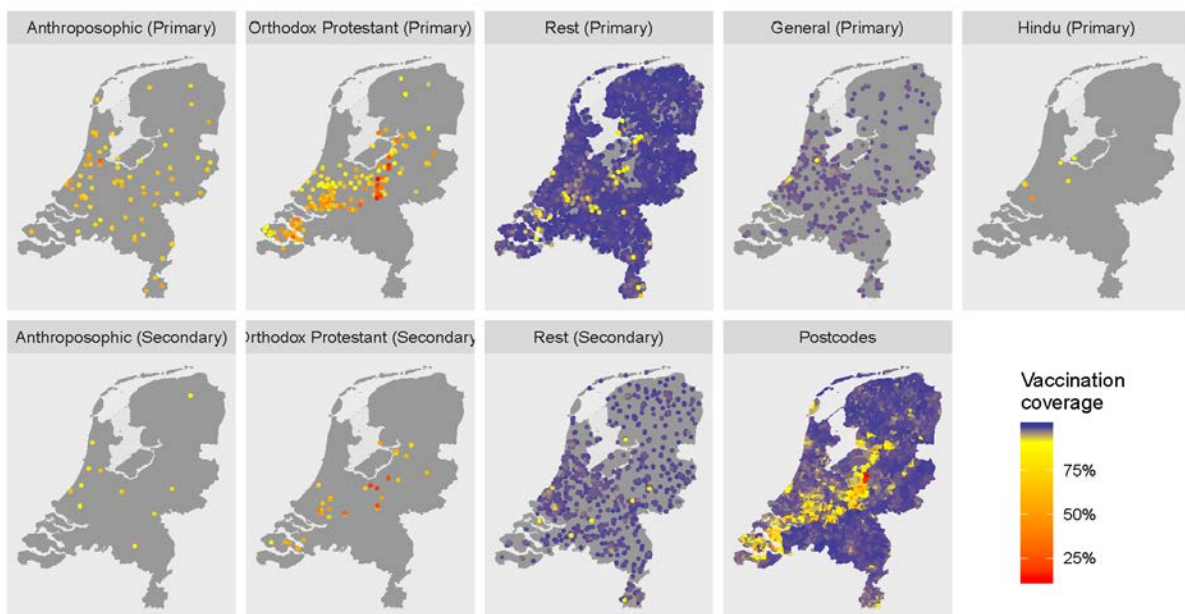

238 Figure 4: geographic distributions of all schools by identity, with colour coded estimated  
239 vaccination coverages. The bottom right map shows the estimated MMR coverages by four-digit  
240 postcode area.

241

242

## 243 Clustering of unvaccinated children

244 In our age cohort dataset of 197,382 10-year old children in the Netherlands in 2013, 4998 (2.5%)  
245 were not vaccinated against MMR. In primary schools, 51% of unvaccinated children attend General  
246 or Rest schools most of which have a very high vaccination coverage, but the rest is clustered in  
247 schools with much lower coverages: 38% in Orthodox Protestant schools, 10% in Anthroposophic  
248 schools, and 1% in Hindu schools (Figure 3, Table 3). When these children go to secondary school,  
249 this hardly changes: 56% go to Rest, 39% to Orthodox Protestant, and 5% to Anthroposophic schools.  
250 Many children move to secondary schools of the same identity as their primary school, more so in  
251 the Orthodox Protestant community (85%) than in the Anthroposophic community (44%), showing  
252 that these children go to low-coverage schools during their whole school career. There were,  
253 however, no children moving between schools with these two identities.

254

## 255 Discussion

256 Our aim was to estimate single-dose MMR vaccination coverages on schools in the Netherlands, and  
257 assess clustering of unvaccinated children in schools. It turns out that about half of the unvaccinated  
258 children are clustered into a small minority of schools with very low vaccination coverage. These are  
259 almost all schools with an Orthodox Protestant or Anthroposophic identity. That implies that  
260 thousands of children per cohort are not protected by vaccination, even when the mean vaccination  
261 coverage of 97.5% is well above WHO recommendations for both infections.

262

263 Spatial clustering of unvaccinated children in the Bible belt is clearly observed at the postcode area  
264 level (Figure 4), and has been described before. Our results, however, show that clustering is much  
265 stronger at the level of schools, which better reflects the social environment of children. Most  
266 schools have vaccination coverages higher than in most postcode areas, whereas some schools of  
267 mainly Orthodox Protestant and Anthroposophic identity have much lower coverages (Figure 3). The  
268 analysis also revealed social clustering outside the Bible belt area (Figure 4). Apart from the good

269 agreement with the validation data, the Orthodox Protestant coverages also confirm estimates of  
270 60% in this community from online surveys by Ruijs et al [19].

271

272 Whereas Orthodox Protestant and Anthroposophical schools are only minority identities, about half  
273 of all unvaccinated children attend these schools with low vaccination coverage (Table 3). Children  
274 not only spend much of their time at school, their social network outside school is probably very  
275 similar. That creates an infection risk for many unvaccinated children, who seem to be protected  
276 when considering their residential four-digit postcode area (Figure 5), let alone the national  
277 vaccination coverage. However, for virus introductions to cause large epidemics, there should also  
278 be sufficient contacts between the schools. Most of these contacts are probably through  
279 households, mainly between primary and secondary schools. Aside from the geographic proximity  
280 (Figure 2), the school identity careers (Table 2) show that the Orthodox Protestant community is  
281 closely knit: 85% of children attending Orthodox Protestant primary schools, also attend secondary  
282 school with that identity, and vice versa. In addition, families in the Orthodox Protestant community  
283 tend to be large. This explains the occasional large epidemics mostly within this community. Because  
284 secondary schools are essential links in the school network, large epidemics may only occur when  
285 the interepidemic period is long enough so that these schools are populated with susceptible  
286 children. This is consistent with the pattern of measles epidemics in the Bible Belt in the  
287 Netherlands, which took place in 1988, 1999, and 2013 [7, 30].

288

289 Anthroposophic schools are less well connected, firstly because they are more evenly distributed  
290 geographically (Figure 2), and secondly because more children going to either an Anthroposophic  
291 primary or an Anthroposophic secondary school but not both (Table 2). Indeed, outbreaks in  
292 Anthroposophic schools tend to stay confined to a few schools [31]. Also, the school feeder data  
293 suggest that the two low-coverage communities are socially separated, as there were no children in  
294 the dataset moving between Orthodox Protestant and Anthroposophic schools (Table 2). As a

295 consequence, during the epidemics in the Orthodox Protestant community, Anthroposophic schools  
296 were hardly affected [7].

297

298 The estimated school vaccination coverages captured the trend of the validation datasets well, but  
299 were too unreliable to report for individual schools (Figure 2). First, they were unprecise, which is  
300 reflected by the wide credible intervals, and caused by the large number of schools compared to  
301 postcode area coverage data. Second, in a few cases estimates were inaccurate, notably for two  
302 schools of the Rest identity (Figure 2), which were Protestant by their registered identity (before  
303 aggregation of identities). Misclassification of some Protestant school is likely: the websites of these  
304 schools reveal an Orthodox identity, and most low-coverage Rest schools in the Bible Belt (Figure 4)  
305 are also Protestant. Third, confounding may have resulted in the estimated low coverages of the  
306 Hindu schools, as a lower coverage was not associated with the Hindu religious group in a large  
307 cross-sectional survey [32], in which 32 out of 35 Hindu respondents of age 1.5-20 were vaccinated  
308 (Mollema, personal communication). Fourth, we used data of a single birth cohort, which may not  
309 be representative if the vaccination coverage has increased or decreased, and which may  
310 overestimate coverage in younger children if they receive their first MMR vaccination at the age of  
311 nine, when the routine second vaccination is offered. If reliable coverages could be obtained, e.g. by  
312 coupling of school and vaccination registries, they could be used to inform parents, to prioritize  
313 supplemental vaccinations during outbreaks, or for more detailed studies into changes in vaccine  
314 hesitancy in different social groups, represented by school identity.

315

316 Pockets of low vaccination coverage and resulting risk of outbreaks are better identified in social  
317 than geographic environments [33]. We assessed heterogeneity in vaccine coverage by estimating  
318 coverages at schools. The reason is that schools are good reflections of the social environment of  
319 children, especially if parents can choose a school with a clear identity like in the Netherlands. For  
320 the Netherlands, we were able to estimate school-level vaccination coverages by relating available



321 postcode-level coverages to schools through the school catchment data, and we could use school  
322 identity to explain much of the variation between schools. In combination with the school feeder  
323 data, we could distinguish two well-connected by mutually separated clusters of schools with low  
324 vaccination coverage. For other countries, the number of postcode areas may be larger than the  
325 number of schools, which would simplify analyses, or alternative variables such as public and private  
326 schools may be more useful. Ideally, school vaccination coverage data are directly available: for  
327 instance, in the United States these are available at school level for some states [23], but often  
328 grouped by county for analysis [26]; also in Germany they are collected at school entry and then  
329 grouped by district [24]. For describing connections between schools, feeder data may be  
330 supplemented (or replaced) by individual level household data to build larger networks of schools  
331 and identify communities at risk.

332

333

- 334 1. Sheikh S, Biundo E, Courcier S, Damm O, Launay O, Maes E, et al. A report on the status of  
335 vaccination in Europe. *Vaccine*. 2018;36(33):4979-92.
- 336 2. World Health Organization. Measles vaccines: WHO position paper - April 2017. *Weekly  
337 epidemiological record*. 2017;92(17):205-27.
- 338 3. World Health Organization. Rubella vaccines: WHO position paper. *Weekly epidemiological  
339 record*. 2011;86(29):301-16.
- 340 4. Truelove SA, Graham M, Moss WJ, Metcalf CJE, Ferrari MJ, Lessler J. Characterizing the  
341 impact of spatial clustering of susceptibility for measles elimination. *Vaccine*. 2019;37(5):732-41.
- 342 5. Hahne S, Macey J, van Binnendijk R, Kohl R, Dolman S, van der Veen Y, et al. Rubella  
343 outbreak in the Netherlands, 2004-2005: high burden of congenital infection and spread to Canada.  
344 *Pediatr Infect Dis J*. 2009;28(9):795-800.

- 345 6. Wielders CC, van Binnendijk RS, Snijders BE, Tipples GA, Cremer J, Fanoy E, et al. Mumps  
346 epidemic in orthodox religious low-vaccination communities in the Netherlands and Canada, 2007 to  
347 2009. *Euro Surveill.* 2011;16(41).
- 348 7. Woudenberg T, van Binnendijk RS, Sanders EA, Wallinga J, de Melker HE, Ruijs WL, et al.  
349 Large measles epidemic in the Netherlands, May 2013 to March 2014: changing epidemiology. *Euro*  
350 *Surveill.* 2017;22(3).
- 351 8. Brownwright TK, Dodson ZM, van Panhuis WG. Spatial clustering of measles vaccination  
352 coverage among children in sub-Saharan Africa. *BMC Public Health.* 2017;17(1):957.
- 353 9. Hagemann C, Streng A, Kraemer A, Liese JG. Heterogeneity in coverage for measles and  
354 varicella vaccination in toddlers - analysis of factors influencing parental acceptance. *BMC Public*  
355 *Health.* 2017;17(1):724.
- 356 10. Lieu TA, Ray GT, Klein NP, Chung C, Kulldorff M. Geographic clusters in underimmunization  
357 and vaccine refusal. *Pediatrics.* 2015;135(2):280-9.
- 358 11. Schlenker TL, Bain C, Baughman AL, Hadler SC. Measles herd immunity. The association of  
359 attack rates with immunization rates in preschool children. *JAMA.* 1992;267(6):823-6.
- 360 12. Thompson KM, Logan GE, Florida SRT. Characterization of Heterogeneity in Childhood  
361 Immunization Coverage in Central Florida Using Immunization Registry Data. *Risk Anal.*  
362 2016;36(7):1418-26.
- 363 13. Spencer CN, Delamater PL. Examining vaccination coverage in Germany: spatiotemporal  
364 clustering of MMR coverage, 2008-14. *Eur J Public Health.* 2020;30(5):993-5.
- 365 14. Xiao X, van Hoek AJ, Kenward MG, Melegaro A, Jit M. Clustering of contacts relevant to the  
366 spread of infectious disease. *Epidemics.* 2016;17:1-9.
- 367 15. Barrabeig I, Rovira A, Munoz P, Batalla J, Rius C, Sanchez JA, et al. MMR vaccine effectiveness  
368 in an outbreak that involved day-care and primary schools. *Vaccine.* 2011;29(45):8024-31.

- 369 16. Sugerman DE, Barskey AE, Delea MG, Ortega-Sanchez IR, Bi D, Ralston KJ, et al. Measles  
370 outbreak in a highly vaccinated population, San Diego, 2008: role of the intentionally  
371 undervaccinated. *Pediatrics*. 2010;125(4):747-55.
- 372 17. Sinclair DR, Grefenstette JJ, Krauland MG, Galloway DD, Frankeny RJ, Travis C, et al.  
373 Forecasted Size of Measles Outbreaks Associated With Vaccination Exemptions for Schoolchildren.  
374 *JAMA Netw Open*. 2019;2(8):e199768.
- 375 18. Gromis A, Liu KY. Spatial Clustering of Vaccine Exemptions on the Risk of a Measles  
376 Outbreak. *Pediatrics*. 2022;149(1).
- 377 19. Ruijs WL, Hautvast JL, van Ansem WJ, Akkermans RP, van't Spijker K, Hulscher ME, et al.  
378 Measuring vaccination coverage in a hard to reach minority. *Eur J Public Health*. 2012;22(3):359-64.
- 379 20. Spaan DH, Ruijs WLM, Hautvast JLA, Tostmann A. Increase in vaccination coverage between  
380 subsequent generations of orthodox Protestants in The Netherlands. *Eur J Public Health*.  
381 2017;27(3):524-30.
- 382 21. Klomp JH, van Lier A, Ruijs WL. Vaccination coverage for measles, mumps and rubella in  
383 anthroposophical schools in Gelderland, The Netherlands. *Eur J Public Health*. 2015;25(3):501-5.
- 384 22. Harmsen IA, Ruiter RAC, Paulussen TGW, Mollema L, Kok G, De Melker HE. Factors that  
385 influence vaccination decision-making by parents who visit an anthroposophical child welfare center:  
386 a focus group study. *Advances in Preventive Medicine*. 2012;2012:175694.
- 387 23. Leslie TF, Street EJ, Delamater PL, Yang YT, Jacobsen KH. Variation in Vaccination Data  
388 Available at School Entry Across the United States. *Am J Public Health*. 2016;106(12):2180-2.
- 389 24. Weigel M, Bruns R, Weitmann K, Hoffmann W. Immunization rates at the school entry in  
390 2012. *Dtsch Arztebl Int*. 2014;111(46):788-94.
- 391 25. Morrison M, Castro LA, Ancel Meyers L. Conscientious vaccination exemptions in  
392 kindergarten to eighth-grade children across Texas schools from 2012 to 2018: A regression analysis.  
393 *PLoS Med*. 2020;17(3):e1003049.

- 394 26. Kluberg SA, McGinnis DP, Hswen Y, Majumder MS, Santillana M, Brownstein JS. County-level  
395 assessment of United States kindergarten vaccination rates for measles mumps rubella (MMR) for  
396 the 2014-2015 school year. *Vaccine*. 2017;35(47):6444-50.
- 397 27. van Lier A, Oomen P, de Hoogh P, Drijfhout I, Elsinghorst B, Kemmeren J, et al. Praeventis,  
398 the immunisation register of the Netherlands: a tool to evaluate the National Immunisation  
399 Programme. *Euro Surveill*. 2012;17(17).
- 400 28. Dienst Uitvoering Onderwijs [Education Executive Agency]. Open databestanden [Open  
401 datafiles] 2013 [Available from: <https://duo.nl/open Onderwijsdata/databestanden/>].
- 402 29. Team RC. R: A language and environment for statistical computing. Vienna, Austria.: R  
403 foundation for statistical computing; 2016.
- 404 30. van den Hof S, Conyn-van Spaendonck MA, van Steenbergen JE. Measles epidemic in the  
405 Netherlands, 1999-2000. *J Infect Dis*. 2002;186(10):1483-6.
- 406 31. van Velzen E, de Coster E, van Binnendijk R, Hahne S. Measles outbreak in an  
407 anthroposophic community in The Hague, The Netherlands, June-July 2008. *Euro Surveill*.  
408 2008;13(31).
- 409 32. Mollema L, Wijers N, Hahne SJ, van der Klis FR, Boshuizen HC, de Melker HE. Participation in  
410 and attitude towards the national immunization program in the Netherlands: data from population-  
411 based questionnaires. *BMC Public Health*. 2012;12:57.
- 412 33. Kauffmann F, Heffernan C, Meurice F, Ota MOC, Vetter V, Casabona G. Measles, mumps,  
413 rubella prevention: how can we do better? *Expert Rev Vaccines*. 2021;20(7):811-26.
- 414
- 415
